# Supplementary material for: BiFeO3 photocathodes for efficient H2O2 production via charge carrier dynamics engineering
Source: Royal Society of Chemistry journal article supplement (doi:10.1039/d2mh00201a), 2022-01-01
Supplement: d2mh00201a1.pdf [file d2mh00201a1.pdf]

# BiFeO<sub>3</sub> Photocathode for Efficient H<sub>2</sub>O<sub>2</sub> Production via Charge Carrier Dynamics Engineering

*Zemin Zhang<sup>a,\*</sup>, Bing Tan<sup>a</sup>, Wenjun Ma<sup>a</sup>, Bo Liu<sup>a</sup>, Mengdi Sun<sup>a</sup>, Jason K. Cooper<sup>b</sup>, Weihua Han<sup>a,\*</sup>*

<sup>a</sup> School of Physical Science and Technology, Lanzhou University, Lanzhou 730000, China.

<sup>b</sup> Chemical Science Division, Lawrence Berkeley National Laboratory, Berkeley, CA 94720,  
USA

## **Corresponding Author**

\* zhangzemin@lzu.edu.cn (Zemin Zhang), hanwh@lzu.edu.cn (Weihua Han)

## Supporting Figures:

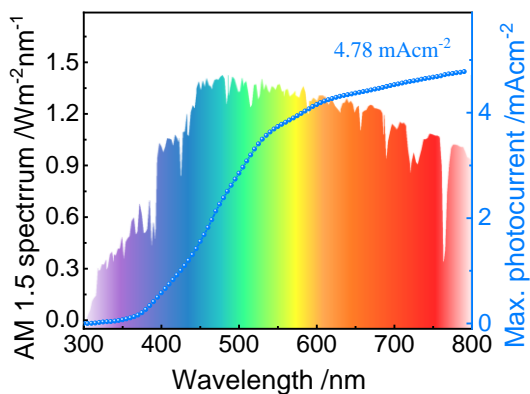

Fig. S1. The theoretical max photocurrent for BFO based photoelectrode.

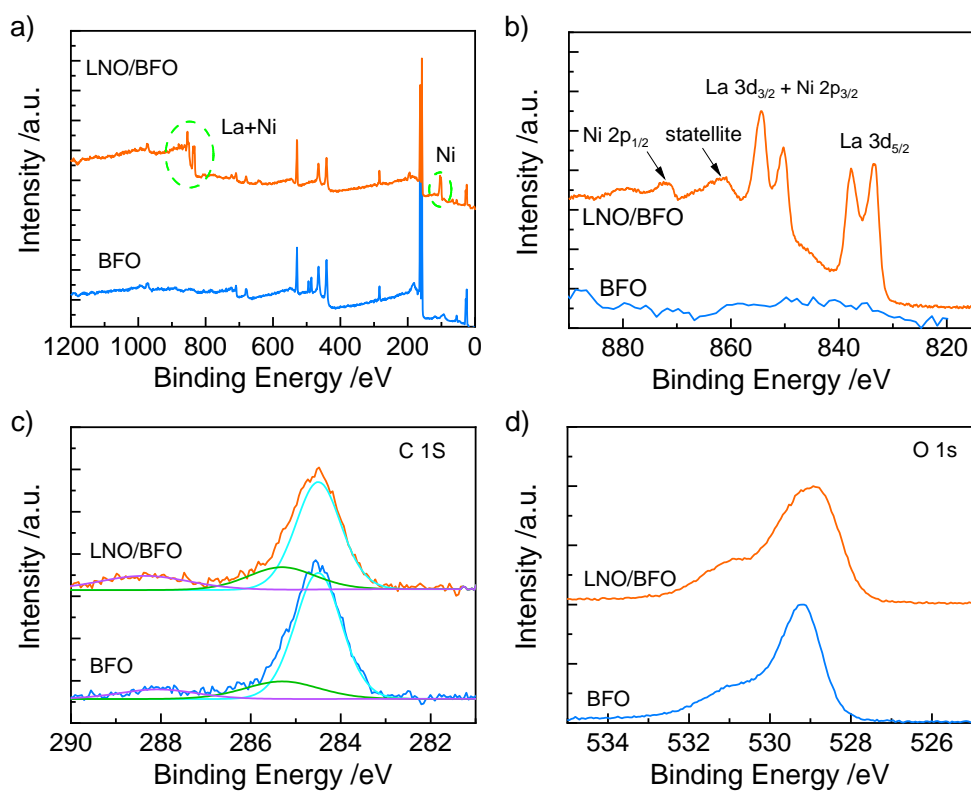

Fig. S2. Survey spectra (a), La 3d and Ni 2p core-level spectra (b), C 1s spectra (c), and O 1s spectra of BFO and LNO/BFO thin film

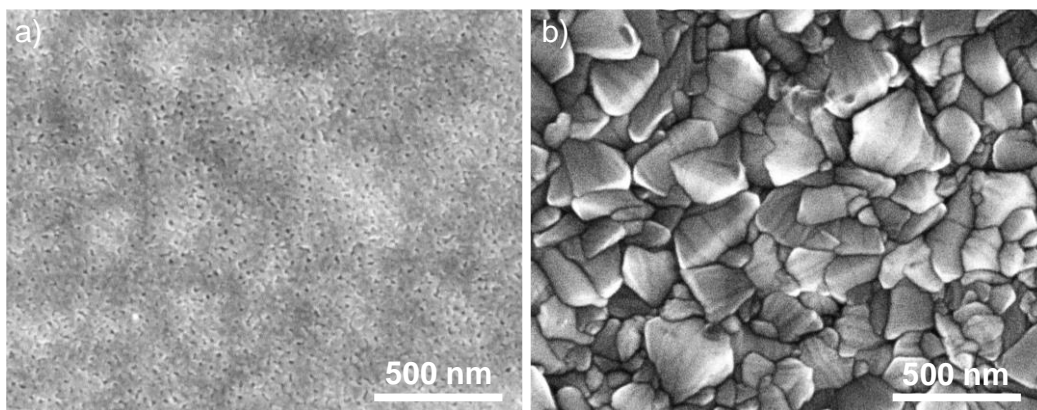

Fig. S3. SEM images of FTO:LNO and FTO.

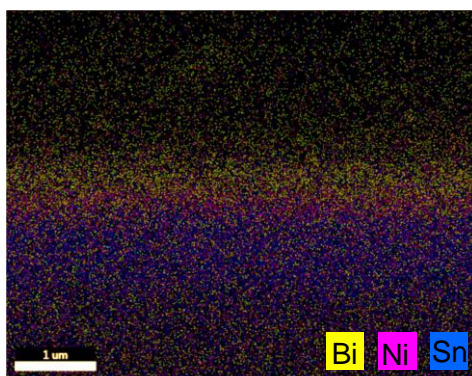

Fig. S4. The cross-section EDX map of LNO/BFO composite film.

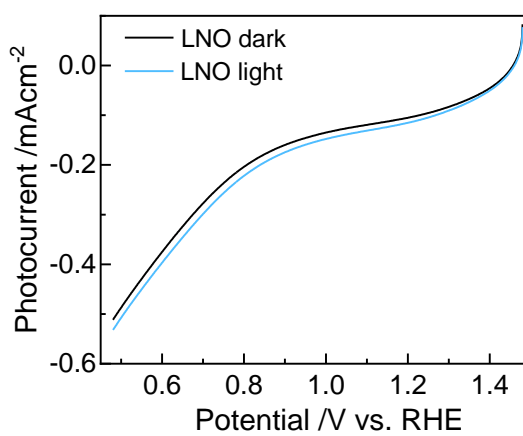

Fig. S5. J-V response of LNO film on FTO substrate.

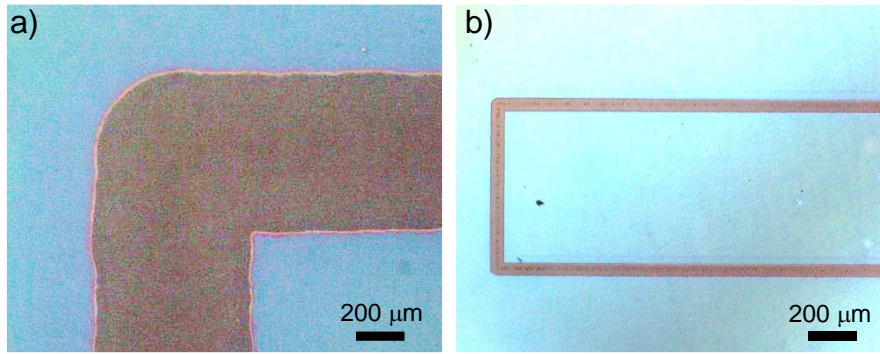

Fig. S6. The optical image of laser-cut FTO substrate.

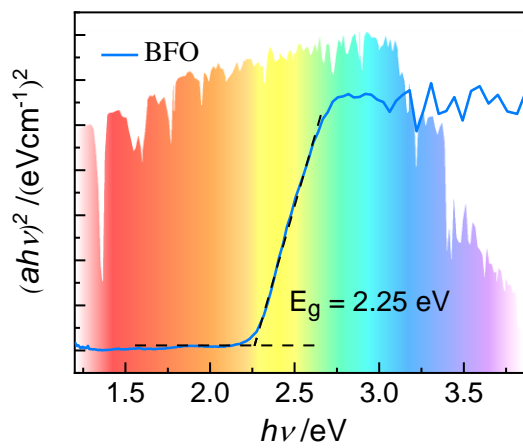

Fig. S7. The tauc plot of BFO film.

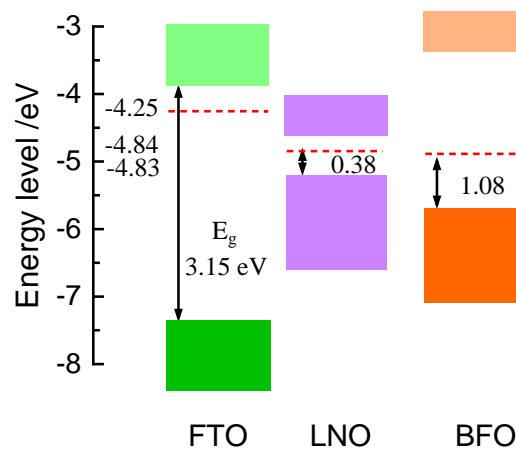

Fig. S8. The band energy diagram of FTO, LNO and BFO before equilibrium.
